# Supplementary material for: Placental DNA Methylation Related to Both Infant Toenail Mercury and Adverse Neurobehavioral Outcomes
Source: PubMed Central journal article supplement (PMC4492267; doi:10.1289/ehp.1408561), 2015-03-06

**Note to Readers:** *EHP* strives to ensure that all journal content is accessible to all readers.

However, some figures and Supplemental Material published in *EHP* articles may not conform to 508 standards due to the complexity of the information being presented. If you need assistance accessing journal content, please contact [ehp508@niehs.nih.gov](mailto:ehp508@niehs.nih.gov). Our staff will work with you to assess and meet your accessibility needs within 3 working days.

## Supplemental Material

### **Placental DNA Methylation Related to Both Infant Toenail Mercury and Adverse Neurobehavioral Outcomes**

Jennifer Z.J. Maccani, Devin C. Koestler, Barry Lester, E. Andrés Houseman, David A. Armstrong, Karl T. Kelsey, and Carmen J. Marsit

#### Table of Contents

**Table S1.** Mean and standard deviation of 13 NNNS scores in infants with non-high-risk vs high-risk NNNS profiles.

**Table S2.** Mean  $\beta$  values and p-values of 339 CpG loci associated with infant toenail Hg (omnibus p-value=0.017; delta- $\beta$ >0.125 between any two Hg tertiles). “NA” indicates that a locus does not fall within a defined gene region according to Illumina annotation data.

**Figure S1.** Heatmap demonstrating methylation in an independent set of 151 placental samples at 339 Hg-associated loci. Placental samples are in columns; rows are 339 loci. High-risk (red) and low-risk (blue) neurobehavioral profiles are color-coded above figure.

**Figure S2.** Plot of placental *EMID2* methylation at 6 CpG loci significantly associated with both infant toenail Hg tertile and high-risk neurobehavioral profile and placental *EMID2* gene expression: A) cg13267931,  $r = -0.40$ ; B) cg27179533,  $r = -0.36$ ; C) cg14874750,  $r = -0.39$ ; D) cg23424003,  $r = -0.33$ ; E) cg27528510,  $r = -0.37$ ; F) cg14048874,  $r = -0.45$ .

**Table S1.** Mean and standard deviation of 13 NNNS scores in infants with non-high-risk vs high-risk NNNS profiles.

| <b>Mean (<math>\pm</math>SD)</b> | <b>Infants with Non-High-Risk NNNS Profiles (n=135)</b> | <b>Infants with High-Risk NNNS Profile (n=16)</b> | <b>p-Value</b> |
|----------------------------------|---------------------------------------------------------|---------------------------------------------------|----------------|
| Habituation <sup>a</sup>         | 7.2 ( $\pm$ 1.6)                                        | 7.5 ( $\pm$ 0.7)                                  | 0.37           |
| Attention <sup>b</sup>           | 3.8 ( $\pm$ 1.1)                                        | 3.4 ( $\pm$ 1.2)                                  | 0.34           |
| Handling                         | 0.4 ( $\pm$ 0.2)                                        | 0.6 ( $\pm$ 0.2)                                  | 0.0003         |
| Quality of movement              | 4.1 ( $\pm$ 0.6)                                        | 3.0 ( $\pm$ 0.5)                                  | 6.33e-8        |
| Regulation <sup>c</sup>          | 4.8 ( $\pm$ 0.8)                                        | 3.5 ( $\pm$ 0.5)                                  | 2.71e-9        |
| Non-optimal reflexes             | 6.3 ( $\pm$ 2.0)                                        | 5.6 ( $\pm$ 3.0)                                  | 0.34           |
| Asymmetric reflexes              | 1.9 ( $\pm$ 1.4)                                        | 1.8 ( $\pm$ 1.3)                                  | 0.77           |
| Stress/abstinence                | 0.2 ( $\pm$ 0.1)                                        | 0.3 ( $\pm$ 0.1)                                  | 0.0009         |
| Arousal                          | 4.0 ( $\pm$ 0.8)                                        | 5.3 ( $\pm$ 0.4)                                  | 1.03e-11       |
| Hypertonicity                    | 0.3 ( $\pm$ 0.6)                                        | 1.2 ( $\pm$ 1.3)                                  | 0.02           |
| Hypotonicity                     | 0.7 ( $\pm$ 1.0)                                        | 0.6 ( $\pm$ 1.2)                                  | 0.73           |
| Excitability                     | 4.4 ( $\pm$ 2.5)                                        | 10.3 ( $\pm$ 1.2)                                 | <2.2e-16       |
| Lethargy                         | 7.0 ( $\pm$ 2.4)                                        | 5.0 ( $\pm$ 2.4)                                  | 0.005          |

<sup>a</sup>60 samples missing habituation data; 53 non-high-risk samples, 7 high-risk samples. <sup>b</sup>16 samples missing attention data; 14 non-high-risk samples, 2 high-risk samples. <sup>c</sup>1 non-high-risk sample missing regulation data.

**Table S2.** Mean  $\beta$  values and p-values of 339 CpG loci associated with infant toenail Hg (omnibus p-value=0.017;  $\Delta\beta > 0.125$  between any two Hg tertiles). “NA” indicates that a locus does not fall within a defined gene region according to Illumina annotation data.

| Illumina CpG Designation | Illumina Gene Symbol Annotation | p-Value for Association with Infant Toenail Hg Tertile | p-Value for Association with High Risk NNNS Profile | Mean $\beta$ -Value for Low Infant Toenail Hg Tertile (Referent) | Mean $\beta$ -Value for Medium Infant Toenail Hg Tertile | Mean $\beta$ -Value for High Infant Toenail Hg Tertile |
|--------------------------|---------------------------------|--------------------------------------------------------|-----------------------------------------------------|------------------------------------------------------------------|----------------------------------------------------------|--------------------------------------------------------|
| cg09415955               | CASZ1                           | 3.9E-07                                                | 0.92                                                | 0.6311                                                           | 0.5325                                                   | 0.5042                                                 |
| cg00054702               | LOC389332                       | 2.1E-05                                                | 0.96                                                | 0.1879                                                           | 0.3792                                                   | 0.3443                                                 |
| cg02124514               | LOC389332                       | 1.9E-05                                                | 0.99                                                | 0.1719                                                           | 0.3598                                                   | 0.3348                                                 |
| cg06680397               | LOC389332                       | 5.4E-05                                                | 0.80                                                | 0.1127                                                           | 0.2751                                                   | 0.2550                                                 |
| cg09142848               | NA                              | 1.2E-05                                                | 0.17                                                | 0.4607                                                           | 0.5990                                                   | 0.5445                                                 |
| cg10454766               | C11orf87                        | 3.1E-05                                                | 0.47                                                | 0.2570                                                           | 0.3966                                                   | 0.3855                                                 |
| cg12195446               | IRS2                            | 4.7E-05                                                | 0.092                                               | 0.6218                                                           | 0.4243                                                   | 0.8543                                                 |
| cg21158476               | LOC389332                       | 5.2E-05                                                | 0.97                                                | 0.1063                                                           | 0.2499                                                   | 0.2226                                                 |
| cg21852408               | C11orf87                        | 1.8E-05                                                | 0.76                                                | 0.3703                                                           | 0.5136                                                   | 0.4987                                                 |
| cg05430997               | NA                              | 5.0E-05                                                | 0.95                                                | 0.6027                                                           | 0.5561                                                   | 0.6946                                                 |
| cg06430688               | NA                              | 1.4E-05                                                | 0.99                                                | 0.6778                                                           | 0.6959                                                   | 0.4826                                                 |
| cg14048874               | EMID2                           | 3.8E-05                                                | 0.0023                                              | 0.2264                                                           | 0.2002                                                   | 0.3416                                                 |
| cg19190016               | NA                              | 1.5E-05                                                | 0.67                                                | 0.4176                                                           | 0.3562                                                   | 0.2899                                                 |
| cg19497031               | POU4F1                          | 3.9E-05                                                | 0.28                                                | 0.0610                                                           | 0.1298                                                   | 0.2007                                                 |
| cg23119063               | NA                              | 1.4E-05                                                | 0.87                                                | 0.7726                                                           | 0.7012                                                   | 0.6268                                                 |
| cg22728830               | NA                              | 5.7E-05                                                | 0.21                                                | 0.4897                                                           | 0.4477                                                   | 0.3499                                                 |
| cg00146240               | NA                              | 6.4E-05                                                | 0.66                                                | 0.7624                                                           | 0.4812                                                   | 0.5847                                                 |
| cg04861929               | C11orf87                        | 8.0E-05                                                | 0.51                                                | 0.2831                                                           | 0.3962                                                   | 0.4118                                                 |
| cg05704942               | MRTO4                           | 0.00013                                                | 0.99                                                | 0.2033                                                           | 0.4288                                                   | 0.3943                                                 |
| cg05956126               | LOC389332                       | 0.00013                                                | 0.92                                                | 0.1260                                                           | 0.2712                                                   | 0.2512                                                 |
| cg07374961               | NA                              | 0.00011                                                | 0.70                                                | 0.4750                                                           | 0.6225                                                   | 0.5429                                                 |
| cg21422164               | RASA3                           | 0.00013                                                | 0.96                                                | 0.4465                                                           | 0.5906                                                   | 0.5149                                                 |
| cg13267931               | EMID2                           | 0.00014                                                | 8.3E-06                                             | 0.2602                                                           | 0.2475                                                   | 0.3818                                                 |
| cg02511231               | TLX3                            | 0.00013                                                | 0.99                                                | 0.4056                                                           | 0.3100                                                   | 0.2767                                                 |
| cg02673015               | TP53TG1; CROT                   | 0.00013                                                | 0.99                                                | 0.2233                                                           | 0.2390                                                   | 0.3527                                                 |
| cg07180307               | C11orf87                        | 0.00012                                                | 0.090                                               | 0.4450                                                           | 0.5678                                                   | 0.5745                                                 |
| cg06719900               | C11orf87; C11orf87              | 0.00017                                                | 0.85                                                | 0.2754                                                           | 0.4332                                                   | 0.4515                                                 |
| cg15892115               | ONECUT2                         | 0.00016                                                | 0.97                                                | 0.2638                                                           | 0.2622                                                   | 0.4102                                                 |
| cg08768621               | ONECUT2                         | 0.00021                                                | 0.99                                                | 0.3477                                                           | 0.3306                                                   | 0.4574                                                 |
| cg09696939               | BICC1                           | 0.00019                                                | 0.43                                                | 0.3399                                                           | 0.2621                                                   | 0.2110                                                 |
| cg12969170               | TP53TG1; CROT                   | 0.00021                                                | 0.79                                                | 0.1662                                                           | 0.1936                                                   | 0.3016                                                 |
| cg12288267               | NA                              | 0.00022                                                | 0.16                                                | 0.5453                                                           | 0.5920                                                   | 0.4320                                                 |

| Illumina CpG Designation | Illumina Gene Symbol Annotation | p-Value for Association with Infant Toenail Hg Tertile | p-Value for Association with High Risk NNNS Profile | Mean $\beta$ -Value for Low Infant Toenail Hg Tertile (Referent) | Mean $\beta$ -Value for Medium Infant Toenail Hg Tertile | Mean $\beta$ -Value for High Infant Toenail Hg Tertile |
|--------------------------|---------------------------------|--------------------------------------------------------|-----------------------------------------------------|------------------------------------------------------------------|----------------------------------------------------------|--------------------------------------------------------|
| cg05986417               | NA                              | 0.00025                                                | 0.19                                                | 0.4955                                                           | 0.6680                                                   | 0.5920                                                 |
| cg16063666               | TP53TG1; CROT                   | 0.00028                                                | 0.90                                                | 0.2234                                                           | 0.2455                                                   | 0.4053                                                 |
| cg05454501               | ZBED3                           | 0.00030                                                | 0.48                                                | 0.0781                                                           | 0.2150                                                   | 0.2657                                                 |
| cg13965724               | P4HTM                           | 0.00030                                                | 0.34                                                | 0.0312                                                           | 0.1714                                                   | 0.0739                                                 |
| cg09856068               | FGF18                           | 0.00039                                                | 0.12                                                | 0.3776                                                           | 0.5570                                                   | 0.4847                                                 |
| cg24642825               | NA                              | 0.00039                                                | 0.94                                                | 0.1708                                                           | 0.3643                                                   | 0.2318                                                 |
| cg03494795               | ABL1                            | 0.00035                                                | 0.62                                                | 0.2264                                                           | 0.1224                                                   | 0.2688                                                 |
| cg11464064               | ABL1                            | 0.00037                                                | 0.95                                                | 0.1927                                                           | 0.0959                                                   | 0.2380                                                 |
| cg03517284               | NA                              | 0.00040                                                | 0.92                                                | 0.2852                                                           | 0.3670                                                   | 0.4198                                                 |
| cg27179533               | EMID2                           | 0.00043                                                | 5.5E-05                                             | 0.3136                                                           | 0.2811                                                   | 0.4263                                                 |
| cg11144103               | PTRF                            | 0.00053                                                | 0.98                                                | 0.4191                                                           | 0.2436                                                   | 0.4795                                                 |
| cg13225272               | NA                              | 0.00058                                                | 0.19                                                | 0.7069                                                           | 0.5499                                                   | 0.6449                                                 |
| cg24900563               | NA                              | 0.00051                                                | 0.45                                                | 0.7672                                                           | 0.6321                                                   | 0.7386                                                 |
| rs4742386                | NA                              | 0.00058                                                | 0.85                                                | 0.7273                                                           | 0.5202                                                   | 0.4002                                                 |
| cg10288784               | ABL1                            | 0.00051                                                | 0.92                                                | 0.1564                                                           | 0.0629                                                   | 0.2020                                                 |
| cg14995921               | SNORA15; CCT6A                  | 0.00057                                                | 0.21                                                | 0.7592                                                           | 0.6499                                                   | 0.8003                                                 |
| cg11199014               | LRFN1                           | 0.00062                                                | 0.093                                               | 0.2460                                                           | 0.2690                                                   | 0.3955                                                 |
| cg20174000               | ABL1                            | 0.00068                                                | 0.90                                                | 0.2264                                                           | 0.1427                                                   | 0.2734                                                 |
| rs939290                 | NA                              | 0.00076                                                | 0.81                                                | 0.7571                                                           | 0.4248                                                   | 0.5393                                                 |
| cg17339147               | WNT2                            | 0.00078                                                | 0.64                                                | 0.1570                                                           | 0.1247                                                   | 0.2514                                                 |
| cg27528510               | EMID2                           | 0.00084                                                | 9.0E-05                                             | 0.3664                                                           | 0.3410                                                   | 0.4853                                                 |
| cg00695177               | NA                              | 0.00086                                                | 0.18                                                | 0.6461                                                           | 0.7235                                                   | 0.8139                                                 |
| cg15436096               | GPR135                          | 0.00089                                                | 0.85                                                | 0.0431                                                           | 0.1292                                                   | 0.2411                                                 |
| cg03920544               | NA                              | 0.00099                                                | 0.24                                                | 0.5687                                                           | 0.6052                                                   | 0.4600                                                 |
| cg02720091               | CASZ1                           | 0.00097                                                | 0.30                                                | 0.5998                                                           | 0.5185                                                   | 0.4570                                                 |
| cg21882477               | STK32A                          | 0.00098                                                | 0.71                                                | 0.2560                                                           | 0.2679                                                   | 0.3819                                                 |
| cg16100355               | MCF2L                           | 0.0014                                                 | 0.13                                                | 0.6194                                                           | 0.7446                                                   | 0.6441                                                 |
| cg19587838               | NA                              | 0.0012                                                 | 0.25                                                | 0.4959                                                           | 0.6267                                                   | 0.5427                                                 |
| cg21864016               | C14orf132                       | 0.0013                                                 | 0.97                                                | 0.8089                                                           | 0.6453                                                   | 0.7325                                                 |
| cg04032226               | PYY;NAGS                        | 0.0013                                                 | 0.96                                                | 0.3106                                                           | 0.3414                                                   | 0.4726                                                 |
| cg07820332               | NA                              | 0.0014                                                 | 0.74                                                | 0.6210                                                           | 0.6629                                                   | 0.5196                                                 |
| cg14874750               | EMID2                           | 0.0013                                                 | 6.1E-05                                             | 0.3214                                                           | 0.2922                                                   | 0.4311                                                 |
| cg06183338               | COL23A1                         | 0.0013                                                 | 0.60                                                | 0.3361                                                           | 0.4324                                                   | 0.4890                                                 |
| cg17163751               | H2AFY2                          | 0.0014                                                 | 0.75                                                | 0.1354                                                           | 0.1773                                                   | 0.2695                                                 |
| cg23448505               | HKR1                            | 0.0016                                                 | 0.26                                                | 0.3249                                                           | 0.1923                                                   | 0.2667                                                 |
| rs133860                 | NA                              | 0.0016                                                 | 0.99                                                | 0.5205                                                           | 0.7887                                                   | 0.7287                                                 |
| cg02090762               | FSCN2                           | 0.0016                                                 | 0.99                                                | 0.3766                                                           | 0.3573                                                   | 0.4922                                                 |
| cg01393340               | CD83                            | 0.0018                                                 | 0.98                                                | 0.4472                                                           | 0.2979                                                   | 0.3291                                                 |
| cg06711418               | MT2A                            | 0.0029                                                 | 0.048                                               | 0.3163                                                           | 0.1892                                                   | 0.4524                                                 |

| Illumina CpG Designation | Illumina Gene Symbol Annotation | p-Value for Association with Infant Toenail Hg Tertile | p-Value for Association with High Risk NNNS Profile | Mean $\beta$ -Value for Low Infant Toenail Hg Tertile (Referent) | Mean $\beta$ -Value for Medium Infant Toenail Hg Tertile | Mean $\beta$ -Value for High Infant Toenail Hg Tertile |
|--------------------------|---------------------------------|--------------------------------------------------------|-----------------------------------------------------|------------------------------------------------------------------|----------------------------------------------------------|--------------------------------------------------------|
| cg13133387               | NA                              | 0.0030                                                 | 0.99                                                | 0.6845                                                           | 0.8205                                                   | 0.7823                                                 |
| cg13506281               | MTUS2                           | 0.0021                                                 | 0.84                                                | 0.6911                                                           | 0.5162                                                   | 0.5153                                                 |
| cg13755866               | NA                              | 0.0024                                                 | 0.13                                                | 0.4682                                                           | 0.6041                                                   | 0.5807                                                 |
| cg18391209               | CAPN8                           | 0.0021                                                 | 0.40                                                | 0.6716                                                           | 0.4133                                                   | 0.5169                                                 |
| cg20919942               | SSH2                            | 0.0019                                                 | 0.032                                               | 0.0659                                                           | 0.1995                                                   | 0.1463                                                 |
| cg26734888               | HKR1                            | 0.0026                                                 | 0.17                                                | 0.2327                                                           | 0.0909                                                   | 0.1517                                                 |
| rs1416770                | NA                              | 0.0020                                                 | 0.22                                                | 0.3147                                                           | 0.5497                                                   | 0.4305                                                 |
| cg09088988               | STK32A                          | 0.0028                                                 | 0.079                                               | 0.2359                                                           | 0.2179                                                   | 0.3945                                                 |
| cg13590055               | LOC100130522; PARD6G            | 0.0021                                                 | 0.84                                                | 0.6616                                                           | 0.6094                                                   | 0.7359                                                 |
| cg16024904               | B3GNT3                          | 0.0023                                                 | 0.60                                                | 0.2946                                                           | 0.2934                                                   | 0.1661                                                 |
| cg23424003               | EMID2                           | 0.0026                                                 | 7.3E-05                                             | 0.4881                                                           | 0.4476                                                   | 0.5888                                                 |
| cg26402828               | PCK2                            | 0.0030                                                 | 0.46                                                | 0.4709                                                           | 0.3980                                                   | 0.5288                                                 |
| cg27256423               | NA                              | 0.0027                                                 | 0.95                                                | 0.7238                                                           | 0.6532                                                   | 0.7864                                                 |
| cg27331524               | WNT2                            | 0.0028                                                 | 0.74                                                | 0.1308                                                           | 0.0899                                                   | 0.2345                                                 |
| cg00002033               | LRFN1                           | 0.0026                                                 | 0.12                                                | 0.1010                                                           | 0.1433                                                   | 0.2457                                                 |
| cg00695416               | CBR1                            | 0.0028                                                 | 0.045                                               | 0.3480                                                           | 0.3890                                                   | 0.5059                                                 |
| cg02096887               | CASZ1                           | 0.0026                                                 | 0.071                                               | 0.6525                                                           | 0.5708                                                   | 0.4888                                                 |
| cg03841977               | CBR1                            | 0.0028                                                 | 0.012                                               | 0.2868                                                           | 0.3408                                                   | 0.4412                                                 |
| cg08475953               | COL23A1                         | 0.0022                                                 | 0.94                                                | 0.2436                                                           | 0.3611                                                   | 0.4579                                                 |
| cg14562786               | FAM75A3                         | 0.0030                                                 | 0.55                                                | 0.6323                                                           | 0.6494                                                   | 0.7647                                                 |
| cg16657538               | ZNF397OS                        | 0.0028                                                 | 0.010                                               | 0.5463                                                           | 0.4826                                                   | 0.4210                                                 |
| cg17240976               | HDLBP                           | 0.0023                                                 | 0.73                                                | 0.4123                                                           | 0.4916                                                   | 0.5708                                                 |
| cg17882660               | ZIC2                            | 0.0026                                                 | 0.58                                                | 0.1604                                                           | 0.2504                                                   | 0.2915                                                 |
| cg20606489               | NA                              | 0.0019                                                 | 0.088                                               | 0.8170                                                           | 0.7914                                                   | 0.6765                                                 |
| cg23169584               | EXOC4                           | 0.0027                                                 | 0.97                                                | 0.7152                                                           | 0.7352                                                   | 0.8513                                                 |
| cg27307781               | CBR1                            | 0.0025                                                 | 0.085                                               | 0.3141                                                           | 0.3784                                                   | 0.5024                                                 |
| cg22244940               | MMP17                           | 0.0031                                                 | 0.044                                               | 0.5573                                                           | 0.6940                                                   | 0.4970                                                 |
| cg24651215               | NA                              | 0.0032                                                 | 0.094                                               | 0.6210                                                           | 0.5590                                                   | 0.6924                                                 |
| cg05280698               | HKR1                            | 0.0035                                                 | 0.28                                                | 0.2259                                                           | 0.0731                                                   | 0.1389                                                 |
| cg24834889               | HKR1                            | 0.0035                                                 | 0.32                                                | 0.2599                                                           | 0.1278                                                   | 0.1890                                                 |
| cg07697895               | WNT2                            | 0.0035                                                 | 0.30                                                | 0.1309                                                           | 0.0747                                                   | 0.2489                                                 |
| cg12451631               | RASGEF1A                        | 0.0035                                                 | 0.66                                                | 0.2416                                                           | 0.3394                                                   | 0.4089                                                 |
| cg07015190               | RPS6KA2                         | 0.0037                                                 | 0.098                                               | 0.2399                                                           | 0.3947                                                   | 0.2603                                                 |
| cg13687570               | HKR1                            | 0.0037                                                 | 0.19                                                | 0.2743                                                           | 0.1292                                                   | 0.1872                                                 |
| cg14166009               | HKR1                            | 0.0037                                                 | 0.19                                                | 0.2667                                                           | 0.1345                                                   | 0.1954                                                 |
| cg03315469               | NA                              | 0.0042                                                 | 0.33                                                | 0.4510                                                           | 0.6101                                                   | 0.5327                                                 |
| cg24385580               | SSH2                            | 0.0042                                                 | 0.072                                               | 0.0688                                                           | 0.1954                                                   | 0.1441                                                 |
| cg03224005               | NA                              | 0.0041                                                 | 0.29                                                | 0.5711                                                           | 0.5145                                                   | 0.3894                                                 |
| cg04517722               | B3GNT3                          | 0.0041                                                 | 0.89                                                | 0.2899                                                           | 0.2976                                                   | 0.1631                                                 |

| Illumina CpG Designation | Illumina Gene Symbol Annotation | p-Value for Association with Infant Toenail Hg Tertile | p-Value for Association with High Risk NNNS Profile | Mean $\beta$ -Value for Low Infant Toenail Hg Tertile (Referent) | Mean $\beta$ -Value for Medium Infant Toenail Hg Tertile | Mean $\beta$ -Value for High Infant Toenail Hg Tertile |
|--------------------------|---------------------------------|--------------------------------------------------------|-----------------------------------------------------|------------------------------------------------------------------|----------------------------------------------------------|--------------------------------------------------------|
| cg07229186               | MT1M                            | 0.0041                                                 | 0.99                                                | 0.3300                                                           | 0.3939                                                   | 0.2687                                                 |
| cg26166804               | H2AFY2                          | 0.0045                                                 | 0.96                                                | 0.1933                                                           | 0.2252                                                   | 0.3565                                                 |
| cg22655988               | CRMP1                           | 0.0046                                                 | 0.26                                                | 0.2022                                                           | 0.3596                                                   | 0.2802                                                 |
| cg12024906               | HKR1                            | 0.0048                                                 | 0.28                                                | 0.2924                                                           | 0.1210                                                   | 0.2025                                                 |
| cg12948621               | HKR1                            | 0.0050                                                 | 0.17                                                | 0.3221                                                           | 0.1584                                                   | 0.2537                                                 |
| cg19080354               | ATHL1                           | 0.0050                                                 | 0.75                                                | 0.4473                                                           | 0.3090                                                   | 0.4037                                                 |
| cg16322262               | GPR135                          | 0.0048                                                 | 0.57                                                | 0.1600                                                           | 0.2088                                                   | 0.2948                                                 |
| cg16662267               | CBR1                            | 0.0050                                                 | 0.049                                               | 0.1957                                                           | 0.2569                                                   | 0.3456                                                 |
| cg21893185               | GPR135                          | 0.0049                                                 | 0.82                                                | 0.0381                                                           | 0.1342                                                   | 0.2224                                                 |
| cg05237503               | FBXO3                           | 0.0052                                                 | 0.99                                                | 0.6767                                                           | 0.4644                                                   | 0.5278                                                 |
| cg08858160               | NA                              | 0.0053                                                 | 0.83                                                | 0.4897                                                           | 0.6220                                                   | 0.5267                                                 |
| cg10320659               | NA                              | 0.0054                                                 | 0.74                                                | 0.2884                                                           | 0.4184                                                   | 0.3760                                                 |
| cg26910511               | LRFN1                           | 0.0053                                                 | 0.22                                                | 0.2166                                                           | 0.2153                                                   | 0.3555                                                 |
| cg22455450               | ZNF808                          | 0.0054                                                 | 0.34                                                | 0.2964                                                           | 0.3390                                                   | 0.4231                                                 |
| cg10165894               | NA                              | 0.0055                                                 | 0.86                                                | 0.3434                                                           | 0.4511                                                   | 0.4709                                                 |
| cg07686394               | NA                              | 0.0056                                                 | 0.19                                                | 0.7276                                                           | 0.5698                                                   | 0.5779                                                 |
| cg05712748               | NA                              | 0.0059                                                 | 0.10                                                | 0.7463                                                           | 0.6059                                                   | 0.5655                                                 |
| cg00321709               | CYP2E1                          | 0.0059                                                 | 0.91                                                | 0.3876                                                           | 0.3066                                                   | 0.4417                                                 |
| cg16744531               | B3GNT3                          | 0.0059                                                 | 0.60                                                | 0.3594                                                           | 0.3680                                                   | 0.2114                                                 |
| cg12386614               | NA                              | 0.0060                                                 | 0.062                                               | 0.6313                                                           | 0.6844                                                   | 0.7794                                                 |
| cg10014563               | GPR135                          | 0.0066                                                 | 0.99                                                | 0.1475                                                           | 0.2055                                                   | 0.2889                                                 |
| cg05115233               | RASA3                           | 0.0070                                                 | 0.95                                                | 0.5088                                                           | 0.6467                                                   | 0.5695                                                 |
| cg16891431               | TCERG1L                         | 0.0068                                                 | 0.88                                                | 0.5291                                                           | 0.3932                                                   | 0.4436                                                 |
| cg21149357               | NA                              | 0.0071                                                 | 0.13                                                | 0.5176                                                           | 0.3922                                                   | 0.5751                                                 |
| cg11009736               | MARCO                           | 0.0071                                                 | 0.92                                                | 0.5728                                                           | 0.4702                                                   | 0.4318                                                 |
| cg15210622               | PPP2R3A                         | 0.0072                                                 | 0.064                                               | 0.5278                                                           | 0.6297                                                   | 0.6612                                                 |
| cg22821834               | GPR135                          | 0.0067                                                 | 0.94                                                | 0.1368                                                           | 0.2065                                                   | 0.2972                                                 |
| cg15165122               | ANKRD53                         | 0.0077                                                 | 0.99                                                | 0.2914                                                           | 0.4259                                                   | 0.3491                                                 |
| cg15351736               | DIXDC1                          | 0.0077                                                 | 0.21                                                | 0.3016                                                           | 0.1617                                                   | 0.2184                                                 |
| cg00243527               | LIF                             | 0.0077                                                 | 0.25                                                | 0.6016                                                           | 0.6153                                                   | 0.7595                                                 |
| cg27467876               | SLC39A14                        | 0.0074                                                 | 0.42                                                | 0.7175                                                           | 0.6616                                                   | 0.5346                                                 |
| cg22848598               | ADAM32                          | 0.0075                                                 | 0.87                                                | 0.4304                                                           | 0.3193                                                   | 0.2763                                                 |
| cg15425276               | ACTN1                           | 0.0083                                                 | 0.98                                                | 0.7486                                                           | 0.6233                                                   | 0.6682                                                 |
| cg08422420               | SDHAP3                          | 0.0085                                                 | 0.62                                                | 0.3187                                                           | 0.1930                                                   | 0.3915                                                 |
| cg03022609               | DIXDC1                          | 0.0092                                                 | 0.20                                                | 0.2776                                                           | 0.1452                                                   | 0.2066                                                 |
| cg08778598               | SDHAP3                          | 0.0092                                                 | 0.66                                                | 0.3490                                                           | 0.2036                                                   | 0.4345                                                 |
| cg11484348               | DEFB116                         | 0.0094                                                 | 0.028                                               | 0.4903                                                           | 0.6161                                                   | 0.5534                                                 |
| cg09310644               | ZFP90                           | 0.0091                                                 | 0.76                                                | 0.4935                                                           | 0.3954                                                   | 0.5276                                                 |
| cg10470368               | NA                              | 0.0094                                                 | 0.0075                                              | 0.6863                                                           | 0.6007                                                   | 0.7413                                                 |

| Illumina CpG Designation | Illumina Gene Symbol Annotation                    | p-Value for Association with Infant Toenail Hg Tertile | p-Value for Association with High Risk NNNS Profile | Mean $\beta$ -Value for Low Infant Toenail Hg Tertile (Referent) | Mean $\beta$ -Value for Medium Infant Toenail Hg Tertile | Mean $\beta$ -Value for High Infant Toenail Hg Tertile |
|--------------------------|----------------------------------------------------|--------------------------------------------------------|-----------------------------------------------------|------------------------------------------------------------------|----------------------------------------------------------|--------------------------------------------------------|
| cg02636041               | RASGEF1A                                           | 0.0092                                                 | 0.32                                                | 0.2299                                                           | 0.3200                                                   | 0.3673                                                 |
| cg04186360               | GPR135                                             | 0.0088                                                 | 0.99                                                | 0.0382                                                           | 0.0966                                                   | 0.1674                                                 |
| cg06721546               | SDHAP3                                             | 0.0095                                                 | 0.30                                                | 0.3205                                                           | 0.2107                                                   | 0.3724                                                 |
| cg10485664               | FEZF1                                              | 0.010                                                  | 0.13                                                | 0.1754                                                           | 0.3530                                                   | 0.2249                                                 |
| cg17951978               | HSD3B2                                             | 0.010                                                  | 0.090                                               | 0.8166                                                           | 0.6787                                                   | 0.7715                                                 |
| cg10172783               | NAGS; PYY                                          | 0.010                                                  | 0.87                                                | 0.2578                                                           | 0.3123                                                   | 0.3878                                                 |
| cg09859398               | GPR135                                             | 0.011                                                  | 0.94                                                | 0.0400                                                           | 0.1247                                                   | 0.2291                                                 |
| cg13401703               | TTC23                                              | 0.012                                                  | 0.029                                               | 0.4096                                                           | 0.2715                                                   | 0.3928                                                 |
| cg20206437               | RPS6KA2                                            | 0.012                                                  | 0.25                                                | 0.2760                                                           | 0.4055                                                   | 0.3026                                                 |
| cg24139169               | DIXDC1                                             | 0.012                                                  | 0.37                                                | 0.3286                                                           | 0.1901                                                   | 0.2596                                                 |
| cg25385940               | TTC23                                              | 0.012                                                  | 0.0059                                              | 0.4391                                                           | 0.3012                                                   | 0.4072                                                 |
| cg11093548               | CREB5                                              | 0.012                                                  | 0.19                                                | 0.2433                                                           | 0.1745                                                   | 0.3358                                                 |
| cg19653246               | MIR654; MIR376B;<br>MIR376A1; MIR376A2;<br>MIR376C | 0.012                                                  | 0.13                                                | 0.5085                                                           | 0.5966                                                   | 0.6733                                                 |
| cg04990378               | C20orf166; MIR133A2                                | 0.012                                                  | 0.76                                                | 0.5715                                                           | 0.4245                                                   | 0.4697                                                 |
| cg27149073               | SDHAP3                                             | 0.013                                                  | 0.35                                                | 0.3945                                                           | 0.2649                                                   | 0.4597                                                 |
| cg10441365               | SAR1B                                              | 0.013                                                  | 0.45                                                | 0.0964                                                           | 0.1137                                                   | 0.2639                                                 |
| cg21488538               | CNGA3                                              | 0.013                                                  | 0.86                                                | 0.3399                                                           | 0.4236                                                   | 0.2986                                                 |
| cg10512745               | DMRTA2                                             | 0.014                                                  | 0.49                                                | 0.1849                                                           | 0.3128                                                   | 0.2012                                                 |
| cg24603464               | MLPH                                               | 0.014                                                  | 0.99                                                | 0.3574                                                           | 0.4321                                                   | 0.3062                                                 |
| cg05114178               | OR5R1; OR8U8                                       | 0.015                                                  | 0.98                                                | 0.4521                                                           | 0.5772                                                   | 0.4179                                                 |
| cg17974166               | NA                                                 | 0.015                                                  | 0.030                                               | 0.4457                                                           | 0.5709                                                   | 0.5040                                                 |
| cg03976877               | VIPR2                                              | 0.015                                                  | 0.83                                                | 0.2981                                                           | 0.4093                                                   | 0.2647                                                 |
| cg12556569               | APOA5                                              | 0.015                                                  | 0.73                                                | 0.2143                                                           | 0.1852                                                   | 0.3560                                                 |
| cg00543972               | DIXDC1                                             | 0.016                                                  | 0.73                                                | 0.3027                                                           | 0.1483                                                   | 0.2114                                                 |
| cg03084184               | JAKMIP3                                            | 0.017                                                  | 0.99                                                | 0.4738                                                           | 0.6098                                                   | 0.4368                                                 |
| cg06520095               | NA                                                 | 0.017                                                  | 0.72                                                | 0.5919                                                           | 0.7537                                                   | 0.5850                                                 |
| rs2208123                | NA                                                 | 0.017                                                  | 0.99                                                | 0.4596                                                           | 0.6734                                                   | 0.5167                                                 |
| cg20250269               | NA                                                 | 0.017                                                  | 0.97                                                | 0.4939                                                           | 0.5717                                                   | 0.3882                                                 |
| cg24960960               | SDHAP3                                             | 0.017                                                  | 0.72                                                | 0.2659                                                           | 0.1709                                                   | 0.3482                                                 |
| cg15652532               | LCLAT1; LCLAT1                                     | 0.017                                                  | 0.90                                                | 0.2461                                                           | 0.3144                                                   | 0.3841                                                 |
| cg23136139               | RASGEF1A                                           | 0.017                                                  | 0.77                                                | 0.3617                                                           | 0.4472                                                   | 0.4935                                                 |
| cg27378537               | SDHAP3                                             | 0.018                                                  | 0.47                                                | 0.3742                                                           | 0.2422                                                   | 0.4233                                                 |
| cg21931717               | SDHAP3                                             | 0.018                                                  | 0.71                                                | 0.2647                                                           | 0.1702                                                   | 0.3383                                                 |
| cg05593887               | MAGI2                                              | 0.018                                                  | 0.99                                                | 0.5444                                                           | 0.5860                                                   | 0.6770                                                 |
| cg02113055               | NA                                                 | 0.019                                                  | 0.62                                                | 0.3803                                                           | 0.6817                                                   | 0.4398                                                 |
| cg08900396               | RPH3AL                                             | 0.019                                                  | 0.10                                                | 0.5842                                                           | 0.7139                                                   | 0.7854                                                 |
| cg25885322               | DIXDC1                                             | 0.019                                                  | 0.26                                                | 0.3026                                                           | 0.1658                                                   | 0.2351                                                 |

| Illumina CpG Designation | Illumina Gene Symbol Annotation | p-Value for Association with Infant Toenail Hg Tertile | p-Value for Association with High Risk NNNS Profile | Mean $\beta$ -Value for Low Infant Toenail Hg Tertile (Referent) | Mean $\beta$ -Value for Medium Infant Toenail Hg Tertile | Mean $\beta$ -Value for High Infant Toenail Hg Tertile |
|--------------------------|---------------------------------|--------------------------------------------------------|-----------------------------------------------------|------------------------------------------------------------------|----------------------------------------------------------|--------------------------------------------------------|
| cg25465065               | PMF1                            | 0.020                                                  | 0.99                                                | 0.3851                                                           | 0.4422                                                   | 0.6057                                                 |
| cg21543270               | PACS2                           | 0.020                                                  | 0.40                                                | 0.5670                                                           | 0.6689                                                   | 0.7057                                                 |
| cg21558508               | SAR1B                           | 0.020                                                  | 0.89                                                | 0.0375                                                           | 0.0566                                                   | 0.1695                                                 |
| cg05714155               | NA                              | 0.022                                                  | 0.54                                                | 0.6045                                                           | 0.4661                                                   | 0.5104                                                 |
| cg16511983               | NA                              | 0.022                                                  | 0.34                                                | 0.2933                                                           | 0.4133                                                   | 0.2582                                                 |
| cg17128947               | CPLX1                           | 0.022                                                  | 0.0054                                              | 0.6007                                                           | 0.4302                                                   | 0.4833                                                 |
| cg12624040               | B3GALT1                         | 0.022                                                  | 0.020                                               | 0.6396                                                           | 0.7331                                                   | 0.6001                                                 |
| cg12466610               | MOSC2                           | 0.023                                                  | 0.73                                                | 0.2007                                                           | 0.1890                                                   | 0.4350                                                 |
| cg02589828               | SAR1B                           | 0.024                                                  | 0.35                                                | 0.1308                                                           | 0.1560                                                   | 0.2600                                                 |
| cg24714905               | ZIC2                            | 0.024                                                  | 0.89                                                | 0.2925                                                           | 0.3706                                                   | 0.4186                                                 |
| cg14056849               | LOC169834                       | 0.026                                                  | 0.84                                                | 0.4439                                                           | 0.3456                                                   | 0.3152                                                 |
| cg00303341               | NA                              | 0.027                                                  | 0.92                                                | 0.7786                                                           | 0.8191                                                   | 0.6924                                                 |
| cg26472636               | SDHAP3                          | 0.029                                                  | 0.40                                                | 0.4083                                                           | 0.2616                                                   | 0.4876                                                 |
| cg18828306               | USH1C                           | 0.029                                                  | 0.89                                                | 0.5526                                                           | 0.4857                                                   | 0.6460                                                 |
| cg17662493               | SMC1B                           | 0.029                                                  | 0.49                                                | 0.5369                                                           | 0.6454                                                   | 0.7041                                                 |
| cg00332745               | NOL3                            | 0.031                                                  | 0.85                                                | 0.2640                                                           | 0.2023                                                   | 0.3437                                                 |
| cg05134500               | MF12                            | 0.031                                                  | 0.56                                                | 0.1443                                                           | 0.2271                                                   | 0.1016                                                 |
| cg07875818               | PLXNA4                          | 0.031                                                  | 0.51                                                | 0.3249                                                           | 0.2666                                                   | 0.4337                                                 |
| cg23490161               | SDHA; CCDC127                   | 0.031                                                  | 0.85                                                | 0.2772                                                           | 0.1634                                                   | 0.3155                                                 |
| cg15385386               | SAR1B                           | 0.031                                                  | 0.66                                                | 0.0951                                                           | 0.1166                                                   | 0.2311                                                 |
| cg23892028               | NA                              | 0.031                                                  | 0.99                                                | 0.4691                                                           | 0.3832                                                   | 0.3165                                                 |
| cg01356752               | NA                              | 0.032                                                  | 0.64                                                | 0.6305                                                           | 0.7111                                                   | 0.7755                                                 |
| rs739259                 | NA                              | 0.035                                                  | 0.10                                                | 0.3100                                                           | 0.4612                                                   | 0.4155                                                 |
| cg12031275               | NA                              | 0.035                                                  | 0.67                                                | 0.7346                                                           | 0.7267                                                   | 0.5979                                                 |
| cg00980980               | NA                              | 0.035                                                  | 0.99                                                | 0.5547                                                           | 0.6787                                                   | 0.7121                                                 |
| rs2125573                | NA                              | 0.036                                                  | 0.99                                                | 0.7329                                                           | 0.5373                                                   | 0.5530                                                 |
| cg16744961               | CLECL1                          | 0.037                                                  | 0.93                                                | 0.5067                                                           | 0.5895                                                   | 0.6572                                                 |
| cg22664298               | ADAMTS19                        | 0.039                                                  | 0.075                                               | 0.2887                                                           | 0.1542                                                   | 0.1658                                                 |
| cg27452255               | NA                              | 0.039                                                  | 0.27                                                | 0.7364                                                           | 0.5537                                                   | 0.7113                                                 |
| cg16519587               | NA                              | 0.039                                                  | 0.30                                                | 0.3560                                                           | 0.2804                                                   | 0.4060                                                 |
| cg20381372               | LOC100134317                    | 0.039                                                  | 0.96                                                | 0.6251                                                           | 0.6904                                                   | 0.7805                                                 |
| cg00689685               | AGPAT1                          | 0.041                                                  | 0.31                                                | 0.5495                                                           | 0.6326                                                   | 0.7122                                                 |
| cg08049519               | NA                              | 0.043                                                  | 0.021                                               | 0.3551                                                           | 0.2713                                                   | 0.5108                                                 |
| cg03349922               | H2AFY2                          | 0.044                                                  | 0.93                                                | 0.1569                                                           | 0.2019                                                   | 0.2852                                                 |
| cg01336390               | NA                              | 0.045                                                  | 0.75                                                | 0.2105                                                           | 0.3622                                                   | 0.2885                                                 |
| cg13697578               | NA                              | 0.045                                                  | 0.92                                                | 0.5953                                                           | 0.6190                                                   | 0.4937                                                 |
| cg14175932               | NA                              | 0.046                                                  | 2.8E-05                                             | 0.6741                                                           | 0.5552                                                   | 0.7104                                                 |
| cg03358735               | ADAMTS17                        | 0.046                                                  | 0.78                                                | 0.8455                                                           | 0.7987                                                   | 0.6949                                                 |
| cg12454169               | LCLAT1                          | 0.047                                                  | 0.99                                                | 0.1831                                                           | 0.2716                                                   | 0.3224                                                 |



| Illumina CpG Designation | Illumina Gene Symbol Annotation | p-Value for Association with Infant Toenail Hg Tertile | p-Value for Association with High Risk NNNS Profile | Mean $\beta$ -Value for Low Infant Toenail Hg Tertile (Referent) | Mean $\beta$ -Value for Medium Infant Toenail Hg Tertile | Mean $\beta$ -Value for High Infant Toenail Hg Tertile |
|--------------------------|---------------------------------|--------------------------------------------------------|-----------------------------------------------------|------------------------------------------------------------------|----------------------------------------------------------|--------------------------------------------------------|
| rs9363764                | NA                              | 0.048                                                  | 0.016                                               | 0.6632                                                           | 0.4439                                                   | 0.4917                                                 |
| cg14264023               | COLEC11                         | 0.048                                                  | 0.98                                                | 0.4861                                                           | 0.4507                                                   | 0.3341                                                 |
| cg24836826               | NCOR2                           | 0.049                                                  | 0.94                                                | 0.6887                                                           | 0.7709                                                   | 0.8368                                                 |
| cg17635970               | HHLA1                           | 0.049                                                  | 0.45                                                | 0.6469                                                           | 0.5036                                                   | 0.7007                                                 |
| cg26531700               | NA                              | 0.050                                                  | 0.98                                                | 0.4140                                                           | 0.3454                                                   | 0.4731                                                 |
| cg13251750               | SERPINA9                        | 0.052                                                  | 0.046                                               | 0.4595                                                           | 0.3507                                                   | 0.3286                                                 |
| cg14317384               | NA                              | 0.053                                                  | 0.79                                                | 0.7288                                                           | 0.6230                                                   | 0.5987                                                 |
| cg18260973               | SAR1B                           | 0.054                                                  | 0.40                                                | 0.0542                                                           | 0.0809                                                   | 0.2278                                                 |
| rs4331560                | NA                              | 0.056                                                  | 0.51                                                | 0.5485                                                           | 0.4149                                                   | 0.5033                                                 |
| cg02658043               | NRBP2                           | 0.057                                                  | 0.99                                                | 0.6361                                                           | 0.5033                                                   | 0.5934                                                 |
| cg18237047               | NA                              | 0.057                                                  | 0.73                                                | 0.6641                                                           | 0.5147                                                   | 0.5885                                                 |
| cg08849813               | SERGEF                          | 0.059                                                  | 0.30                                                | 0.6289                                                           | 0.7286                                                   | 0.5543                                                 |
| cg25420101               | WDR41                           | 0.060                                                  | 0.95                                                | 0.4935                                                           | 0.3438                                                   | 0.4036                                                 |
| cg23318063               | NA                              | 0.061                                                  | 0.87                                                | 0.3075                                                           | 0.2529                                                   | 0.3804                                                 |
| rs966367                 | NA                              | 0.064                                                  | 0.86                                                | 0.5019                                                           | 0.2892                                                   | 0.4370                                                 |
| cg11497957               | ZNF572                          | 0.069                                                  | 0.13                                                | 0.3429                                                           | 0.2062                                                   | 0.2477                                                 |
| cg19245335               | PRDM15                          | 0.068                                                  | 0.95                                                | 0.7400                                                           | 0.5900                                                   | 0.5349                                                 |
| cg01127608               | LMX1B                           | 0.069                                                  | 0.37                                                | 0.5105                                                           | 0.5975                                                   | 0.4577                                                 |
| cg05062612               | WSCD2                           | 0.070                                                  | 0.99                                                | 0.3202                                                           | 0.4616                                                   | 0.3991                                                 |
| cg09481537               | NA                              | 0.071                                                  | 0.57                                                | 0.4696                                                           | 0.5266                                                   | 0.3696                                                 |
| cg10156366               | NA                              | 0.071                                                  | 0.039                                               | 0.2463                                                           | 0.3116                                                   | 0.1755                                                 |
| cg27591450               | NA                              | 0.072                                                  | 0.99                                                | 0.3055                                                           | 0.2994                                                   | 0.1789                                                 |
| cg05900567               | NA                              | 0.077                                                  | 0.043                                               | 0.4032                                                           | 0.4542                                                   | 0.5863                                                 |
| cg19726179               | H2AFY2                          | 0.080                                                  | 0.80                                                | 0.1433                                                           | 0.1841                                                   | 0.2869                                                 |
| rs264581                 | NA                              | 0.081                                                  | 0.36                                                | 0.2716                                                           | 0.4195                                                   | 0.4597                                                 |
| cg05279330               | NA                              | 0.083                                                  | 0.20                                                | 0.6516                                                           | 0.5806                                                   | 0.7157                                                 |
| rs1941955                | NA                              | 0.087                                                  | 0.79                                                | 0.5935                                                           | 0.6044                                                   | 0.8018                                                 |
| rs10774834               | NA                              | 0.090                                                  | 0.54                                                | 0.6052                                                           | 0.7993                                                   | 0.5855                                                 |
| cg01948148               | SAR1B                           | 0.091                                                  | 0.77                                                | 0.0742                                                           | 0.0855                                                   | 0.2234                                                 |
| cg17323488               | NA                              | 0.091                                                  | 0.58                                                | 0.4136                                                           | 0.3826                                                   | 0.2885                                                 |
| cg13236378               | WSCD2                           | 0.10                                                   | 0.99                                                | 0.3095                                                           | 0.4413                                                   | 0.3780                                                 |
| cg14554788               | C3orf26                         | 0.11                                                   | 0.75                                                | 0.8363                                                           | 0.7110                                                   | 0.8426                                                 |
| cg15170605               | ADD2                            | 0.11                                                   | 0.40                                                | 0.2480                                                           | 0.2377                                                   | 0.4482                                                 |
| cg05519582               | GRAMD4                          | 0.11                                                   | 0.58                                                | 0.5688                                                           | 0.6391                                                   | 0.7130                                                 |
| cg08024264               | SCARNA16; C17orf86              | 0.11                                                   | 0.79                                                | 0.4630                                                           | 0.3074                                                   | 0.3248                                                 |
| cg26293310               | SAR1B                           | 0.11                                                   | 0.49                                                | 0.0591                                                           | 0.0785                                                   | 0.2373                                                 |
| cg12894709               | PURA                            | 0.12                                                   | 0.98                                                | 0.4358                                                           | 0.5740                                                   | 0.4829                                                 |
| cg15845365               | MYO10                           | 0.12                                                   | 0.19                                                | 0.2852                                                           | 0.1516                                                   | 0.2836                                                 |
| cg20673830               | NA                              | 0.12                                                   | 0.62                                                | 0.4777                                                           | 0.4224                                                   | 0.5999                                                 |

| Illumina CpG Designation | Illumina Gene Symbol Annotation | p-Value for Association with Infant Toenail Hg Tertile | p-Value for Association with High Risk NNNS Profile | Mean $\beta$ -Value for Low Infant Toenail Hg Tertile (Referent) | Mean $\beta$ -Value for Medium Infant Toenail Hg Tertile | Mean $\beta$ -Value for High Infant Toenail Hg Tertile |
|--------------------------|---------------------------------|--------------------------------------------------------|-----------------------------------------------------|------------------------------------------------------------------|----------------------------------------------------------|--------------------------------------------------------|
| cg27230769               | LOC285830                       | 0.12                                                   | 0.83                                                | 0.5095                                                           | 0.4939                                                   | 0.6819                                                 |
| cg13275129               | MAML2                           | 0.12                                                   | 0.80                                                | 0.6344                                                           | 0.7412                                                   | 0.7726                                                 |
| cg20187719               | LOC285375                       | 0.12                                                   | 0.38                                                | 0.3162                                                           | 0.2591                                                   | 0.1697                                                 |
| cg06417478               | HOOK2                           | 0.12                                                   | 0.82                                                | 0.3427                                                           | 0.5011                                                   | 0.3551                                                 |
| rs798149                 | NA                              | 0.12                                                   | 0.27                                                | 0.5868                                                           | 0.4762                                                   | 0.4159                                                 |
| cg04194432               | NA                              | 0.12                                                   | 0.81                                                | 0.4056                                                           | 0.2480                                                   | 0.3826                                                 |
| rs715359                 | NA                              | 0.13                                                   | 0.88                                                | 0.7906                                                           | 0.7184                                                   | 0.5900                                                 |
| cg23160717               | PURA                            | 0.13                                                   | 0.87                                                | 0.4395                                                           | 0.5683                                                   | 0.4794                                                 |
| cg07021532               | ZFP2                            | 0.13                                                   | 0.72                                                | 0.2070                                                           | 0.3495                                                   | 0.3775                                                 |
| rs1510480                | NA                              | 0.13                                                   | 0.39                                                | 0.3765                                                           | 0.5571                                                   | 0.4669                                                 |
| rs2385226                | NA                              | 0.13                                                   | 0.93                                                | 0.5507                                                           | 0.3302                                                   | 0.4722                                                 |
| rs6982811                | NA                              | 0.14                                                   | 0.32                                                | 0.5042                                                           | 0.3022                                                   | 0.4201                                                 |
| cg03384579               | ADD2                            | 0.14                                                   | 0.45                                                | 0.1406                                                           | 0.1370                                                   | 0.2788                                                 |
| rs951295                 | NA                              | 0.15                                                   | 0.94                                                | 0.4017                                                           | 0.2953                                                   | 0.4416                                                 |
| rs5936512                | NA                              | 0.15                                                   | 0.32                                                | 0.1812                                                           | 0.3388                                                   | 0.3164                                                 |
| cg02343823               | ZNF300                          | 0.15                                                   | 0.28                                                | 0.5007                                                           | 0.6298                                                   | 0.4677                                                 |
| cg11593111               | PURA                            | 0.15                                                   | 0.96                                                | 0.4493                                                           | 0.5791                                                   | 0.4859                                                 |
| cg12469381               | CHN2                            | 0.16                                                   | 0.13                                                | 0.5052                                                           | 0.4908                                                   | 0.6716                                                 |
| cg24694833               | NA                              | 0.16                                                   | 0.89                                                | 0.5718                                                           | 0.5669                                                   | 0.7444                                                 |
| cg18318704               | SAR1B                           | 0.17                                                   | 0.52                                                | 0.0478                                                           | 0.0636                                                   | 0.1914                                                 |
| rs6546473                | NA                              | 0.18                                                   | 0.92                                                | 0.3187                                                           | 0.1223                                                   | 0.2504                                                 |
| cg04453550               | TNFRSF17                        | 0.18                                                   | 0.96                                                | 0.5815                                                           | 0.5156                                                   | 0.6935                                                 |
| cg25649515               | NA                              | 0.18                                                   | 0.16                                                | 0.5326                                                           | 0.5828                                                   | 0.4472                                                 |
| rs654498                 | NA                              | 0.18                                                   | 0.31                                                | 0.6217                                                           | 0.5416                                                   | 0.6780                                                 |
| cg05971102               | NA                              | 0.19                                                   | 0.83                                                | 0.4956                                                           | 0.6279                                                   | 0.5225                                                 |
| cg02546601               | NA                              | 0.19                                                   | 0.72                                                | 0.6029                                                           | 0.6777                                                   | 0.5250                                                 |
| rs2857639                | NA                              | 0.20                                                   | 0.24                                                | 0.5360                                                           | 0.5245                                                   | 0.3058                                                 |
| cg08603678               | EIF3E                           | 0.20                                                   | 0.34                                                | 0.5358                                                           | 0.7052                                                   | 0.5806                                                 |
| cg13092806               | NA                              | 0.20                                                   | 0.98                                                | 0.3146                                                           | 0.3992                                                   | 0.2340                                                 |
| cg05659187               | ADD2                            | 0.21                                                   | 0.30                                                | 0.2206                                                           | 0.1956                                                   | 0.3540                                                 |
| cg13568515               | JAK2                            | 0.21                                                   | 0.51                                                | 0.9237                                                           | 0.7987                                                   | 0.9311                                                 |
| cg04675542               | ZNF300                          | 0.21                                                   | 0.35                                                | 0.4763                                                           | 0.5849                                                   | 0.4556                                                 |
| cg23427269               | ADD2                            | 0.21                                                   | 0.21                                                | 0.2090                                                           | 0.1748                                                   | 0.3499                                                 |
| cg19863210               | DENND3                          | 0.22                                                   | 0.96                                                | 0.2719                                                           | 0.3985                                                   | 0.3165                                                 |
| cg15454726               | NA                              | 0.22                                                   | 0.094                                               | 0.1802                                                           | 0.2461                                                   | 0.3186                                                 |
| cg07501029               | KIF26B                          | 0.23                                                   | 0.95                                                | 0.5647                                                           | 0.3774                                                   | 0.4905                                                 |
| cg20592836               | TP53INP2                        | 0.23                                                   | 0.96                                                | 0.2940                                                           | 0.4003                                                   | 0.2660                                                 |
| cg18816122               | PLEKHG4B                        | 0.23                                                   | 0.92                                                | 0.3944                                                           | 0.4939                                                   | 0.5513                                                 |
| cg21203249               | SEMA4D                          | 0.24                                                   | 0.56                                                | 0.5604                                                           | 0.4966                                                   | 0.6472                                                 |

| Illumina CpG Designation | Illumina Gene Symbol Annotation | p-Value for Association with Infant Toenail Hg Tertile | p-Value for Association with High Risk NNNS Profile | Mean $\beta$ -Value for Low Infant Toenail Hg Tertile (Referent) | Mean $\beta$ -Value for Medium Infant Toenail Hg Tertile | Mean $\beta$ -Value for High Infant Toenail Hg Tertile |
|--------------------------|---------------------------------|--------------------------------------------------------|-----------------------------------------------------|------------------------------------------------------------------|----------------------------------------------------------|--------------------------------------------------------|
| rs9292570                | NA                              | 0.26                                                   | 0.50                                                | 0.6088                                                           | 0.5916                                                   | 0.4260                                                 |
| cg19783435               | ARVCF                           | 0.26                                                   | 0.80                                                | 0.1670                                                           | 0.2934                                                   | 0.2097                                                 |
| cg22109827               | NA                              | 0.26                                                   | 0.64                                                | 0.5077                                                           | 0.5809                                                   | 0.6521                                                 |
| cg18237551               | ZNF300                          | 0.26                                                   | 0.57                                                | 0.4189                                                           | 0.5450                                                   | 0.3609                                                 |
| cg07258916               | PLXNA4                          | 0.27                                                   | 0.49                                                | 0.1574                                                           | 0.0553                                                   | 0.1911                                                 |
| cg02907150               | PCNX                            | 0.28                                                   | 0.99                                                | 0.5630                                                           | 0.4569                                                   | 0.6011                                                 |
| rs10033147               | NA                              | 0.28                                                   | 0.99                                                | 0.5088                                                           | 0.6533                                                   | 0.6220                                                 |
| cg26864826               | NA                              | 0.28                                                   | 0.90                                                | 0.4204                                                           | 0.3237                                                   | 0.2850                                                 |
| cg21913319               | COL24A1                         | 0.29                                                   | 0.99                                                | 0.2864                                                           | 0.1818                                                   | 0.3246                                                 |
| cg12568536               | NA                              | 0.30                                                   | 0.96                                                | 0.5203                                                           | 0.3809                                                   | 0.5326                                                 |
| cg11291313               | ZNF300                          | 0.30                                                   | 0.53                                                | 0.4040                                                           | 0.4960                                                   | 0.3654                                                 |
| cg01891583               | USP7                            | 0.30                                                   | 0.59                                                | 0.5369                                                           | 0.5995                                                   | 0.3765                                                 |
| cg24347663               | ADD2                            | 0.30                                                   | 0.32                                                | 0.1928                                                           | 0.1681                                                   | 0.3234                                                 |
| cg03609614               | ZNF300                          | 0.33                                                   | 0.063                                               | 0.2995                                                           | 0.4193                                                   | 0.2841                                                 |
| cg27639199               | TMC3                            | 0.34                                                   | 0.47                                                | 0.2734                                                           | 0.3809                                                   | 0.3990                                                 |
| cg03988092               | NA                              | 0.35                                                   | 0.99                                                | 0.1899                                                           | 0.2053                                                   | 0.3313                                                 |
| cg08857144               | ADD2                            | 0.36                                                   | 0.24                                                | 0.2065                                                           | 0.1846                                                   | 0.3322                                                 |
| cg22851875               | NA                              | 0.37                                                   | 0.56                                                | 0.5811                                                           | 0.5948                                                   | 0.4395                                                 |
| cg04462931               | NA                              | 0.38                                                   | 0.24                                                | 0.6811                                                           | 0.5663                                                   | 0.7113                                                 |
| cg21164300               | NA                              | 0.39                                                   | 0.15                                                | 0.3268                                                           | 0.4501                                                   | 0.2925                                                 |
| cg04610028               | RAB11B                          | 0.39                                                   | 0.067                                               | 0.6429                                                           | 0.5844                                                   | 0.7462                                                 |
| rs1484127                | NA                              | 0.43                                                   | 0.88                                                | 0.5191                                                           | 0.7044                                                   | 0.5806                                                 |
| cg10376408               | SCUBE2                          | 0.43                                                   | 0.99                                                | 0.4842                                                           | 0.4112                                                   | 0.5436                                                 |
| rs5987737                | NA                              | 0.45                                                   | 0.30                                                | 0.6220                                                           | 0.4909                                                   | 0.6358                                                 |
| rs13369115               | NA                              | 0.45                                                   | 0.99                                                | 0.6057                                                           | 0.7165                                                   | 0.5307                                                 |
| cg03449867               | OCA2                            | 0.52                                                   | 0.62                                                | 0.4201                                                           | 0.3456                                                   | 0.5356                                                 |
| cg00988148               | NA                              | 0.55                                                   | 0.92                                                | 0.3586                                                           | 0.2481                                                   | 0.3980                                                 |
| cg21228005               | ZNF300                          | 0.55                                                   | 0.097                                               | 0.4459                                                           | 0.5307                                                   | 0.4013                                                 |
| cg26846609               | THUMPD1                         | 0.56                                                   | 0.97                                                | 0.4786                                                           | 0.5349                                                   | 0.6100                                                 |
| cg24844518               | CYFIP2                          | 0.58                                                   | 0.027                                               | 0.5423                                                           | 0.4271                                                   | 0.5851                                                 |
| cg16043227               | CCR6                            | 0.62                                                   | 0.087                                               | 0.5333                                                           | 0.6000                                                   | 0.4591                                                 |
| cg17138852               | NA                              | 0.62                                                   | 0.98                                                | 0.3936                                                           | 0.3040                                                   | 0.4512                                                 |
| cg24506221               | GSTM1                           | 0.70                                                   | 0.011                                               | 0.4747                                                           | 0.3923                                                   | 0.5269                                                 |
| rs3818562                | NA                              | 0.72                                                   | 0.72                                                | 0.5568                                                           | 0.4087                                                   | 0.5327                                                 |
| cg20696478               | ZNF175                          | 0.85                                                   | 0.15                                                | 0.2371                                                           | 0.3065                                                   | 0.1675                                                 |
| cg07319199               | ANTXR1                          | 0.89                                                   | 0.047                                               | 0.6930                                                           | 0.7818                                                   | 0.6453                                                 |

**Figure S1.** Heatmap demonstrating methylation in an independent set of 151 placental samples at 339 Hg-associated loci. Placental samples are in columns; rows are 339 loci. High-risk (red) and low-risk (blue) neurobehavioral profiles are color-coded above figure.

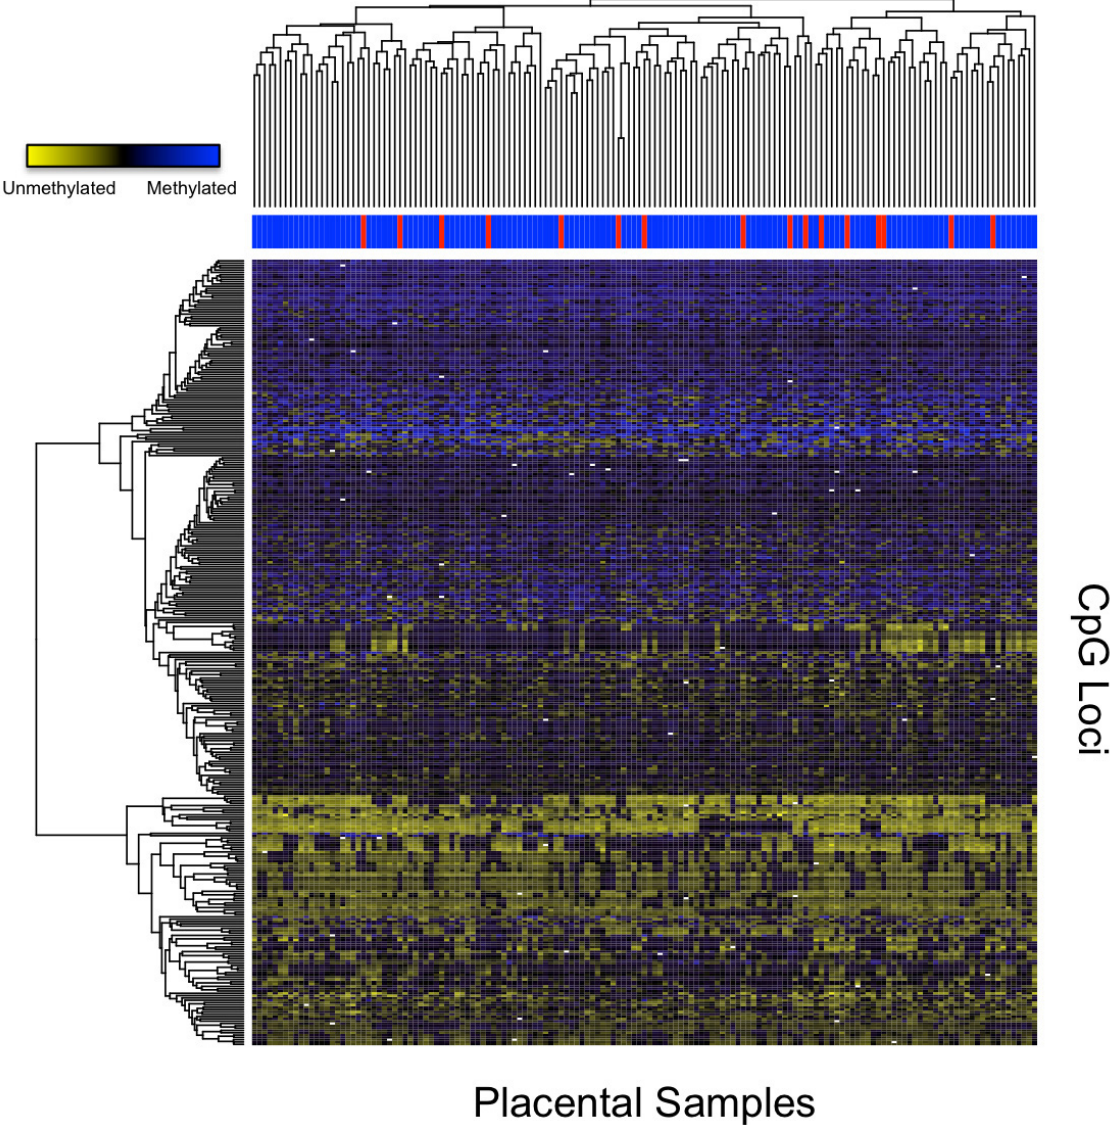

**Figure S2.** Plot of placental *EMID2* methylation at 6 CpG loci significantly associated with both infant toenail Hg tertile and high-risk neurobehavioral profile and placental *EMID2* gene expression: A) cg13267931,  $r = -0.40$ ; B) cg27179533,  $r = -0.36$ ; C) cg14874750,  $r = -0.39$ ; D) cg23424003,  $r = -0.33$ ; E) cg27528510,  $r = -0.37$ ; F) cg14048874,  $r = -0.45$ .

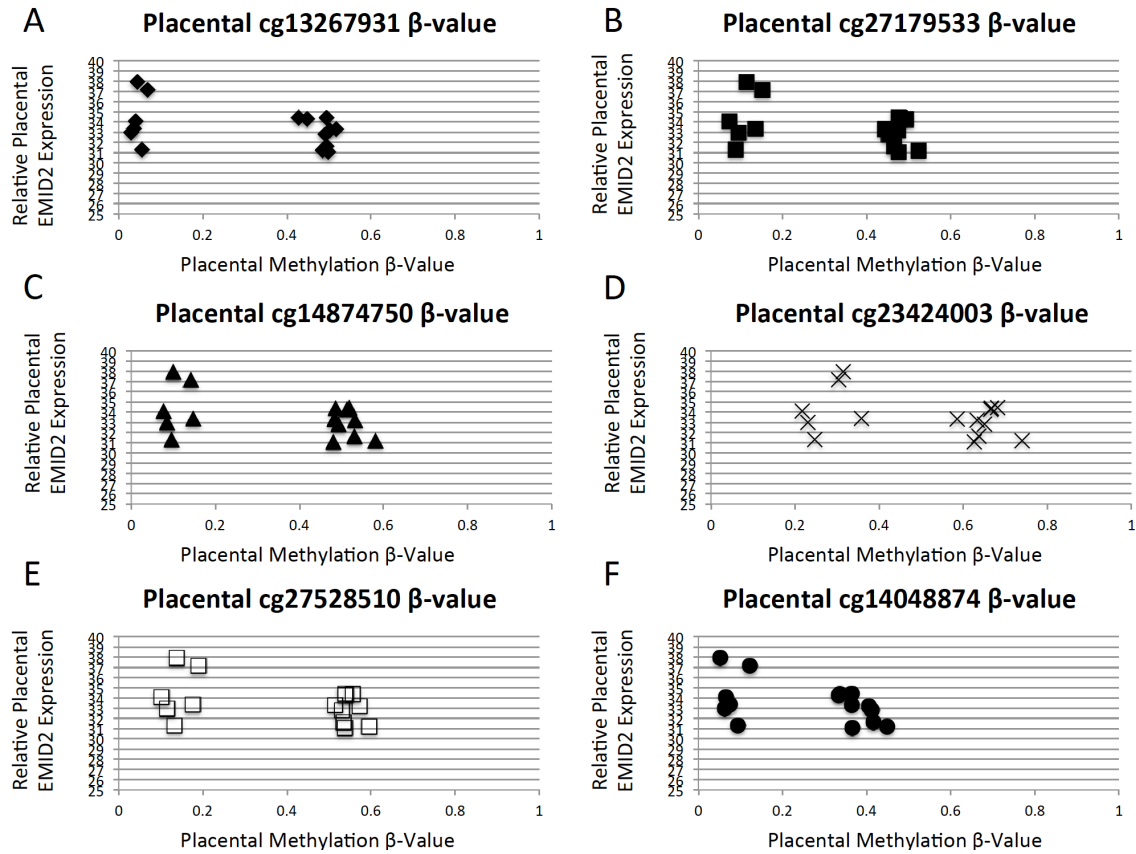

Supplement: ehp.1408561.s001.acco.pdf [file ehp.1408561.s001.acco.pdf]
